# Supplementary material for: Global Clear-Sky Aerosol Speciated Direct Radiative Effects over 40 Years (1980–2019)
Source: MDPI journal article supplement (doi:10.3390/atmos12101254), 2021-09-27
Supplement: s1 [file s1]

*Article*

# Global Clear-Sky Aerosol Speciated Direct Radiative Effects over 40 Years (1980–2019)

## Supplement

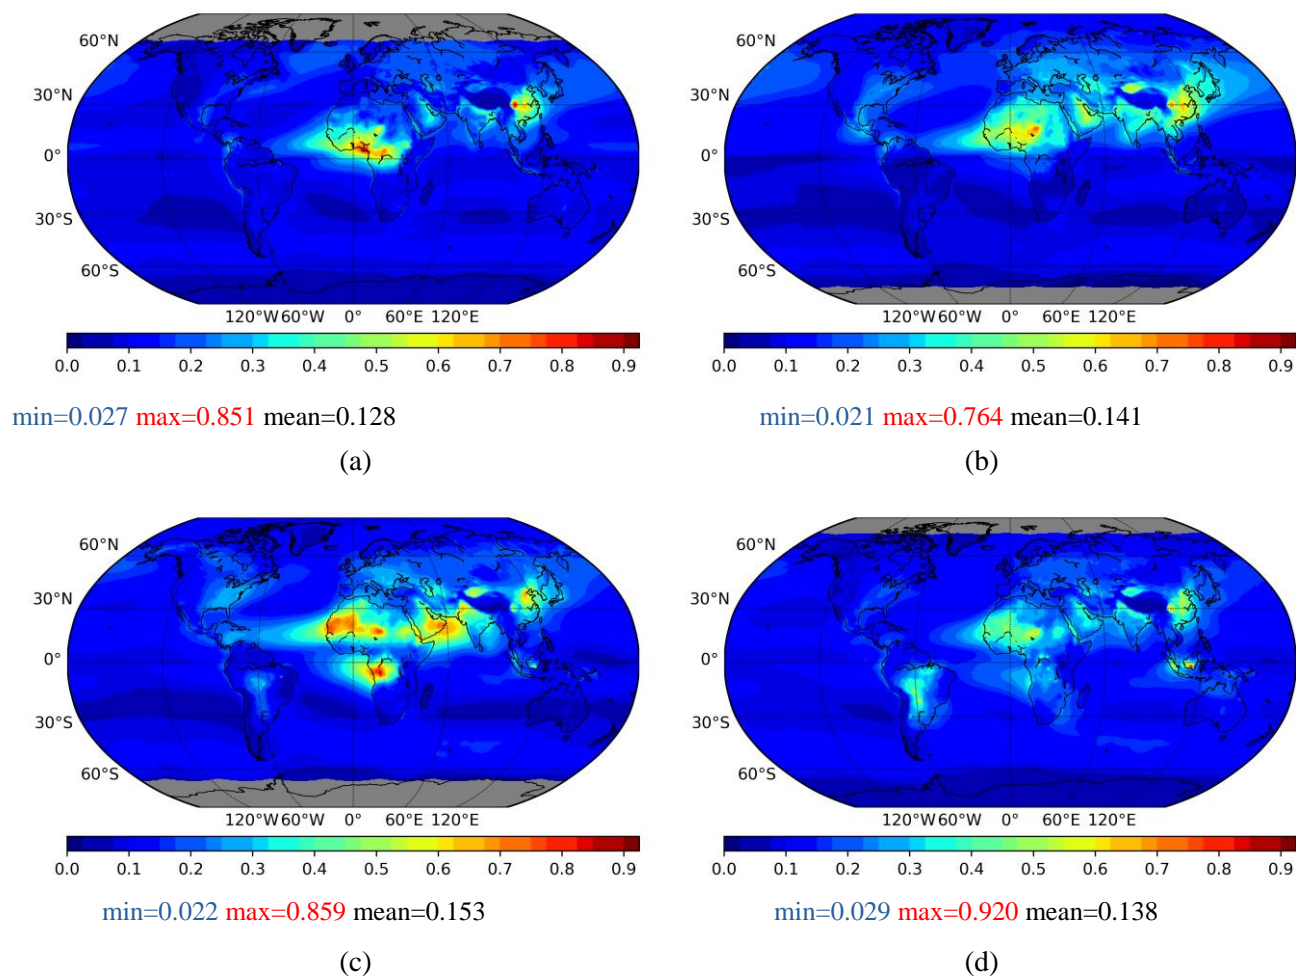

**Figure S1i.** Mean seasonal (1980–2019) global distribution of MERRA-2 Optical Depth at the wavelength of 550 nm for the total aerosol load. (a) winter, (b) spring, (c) summer, (d) autumn.

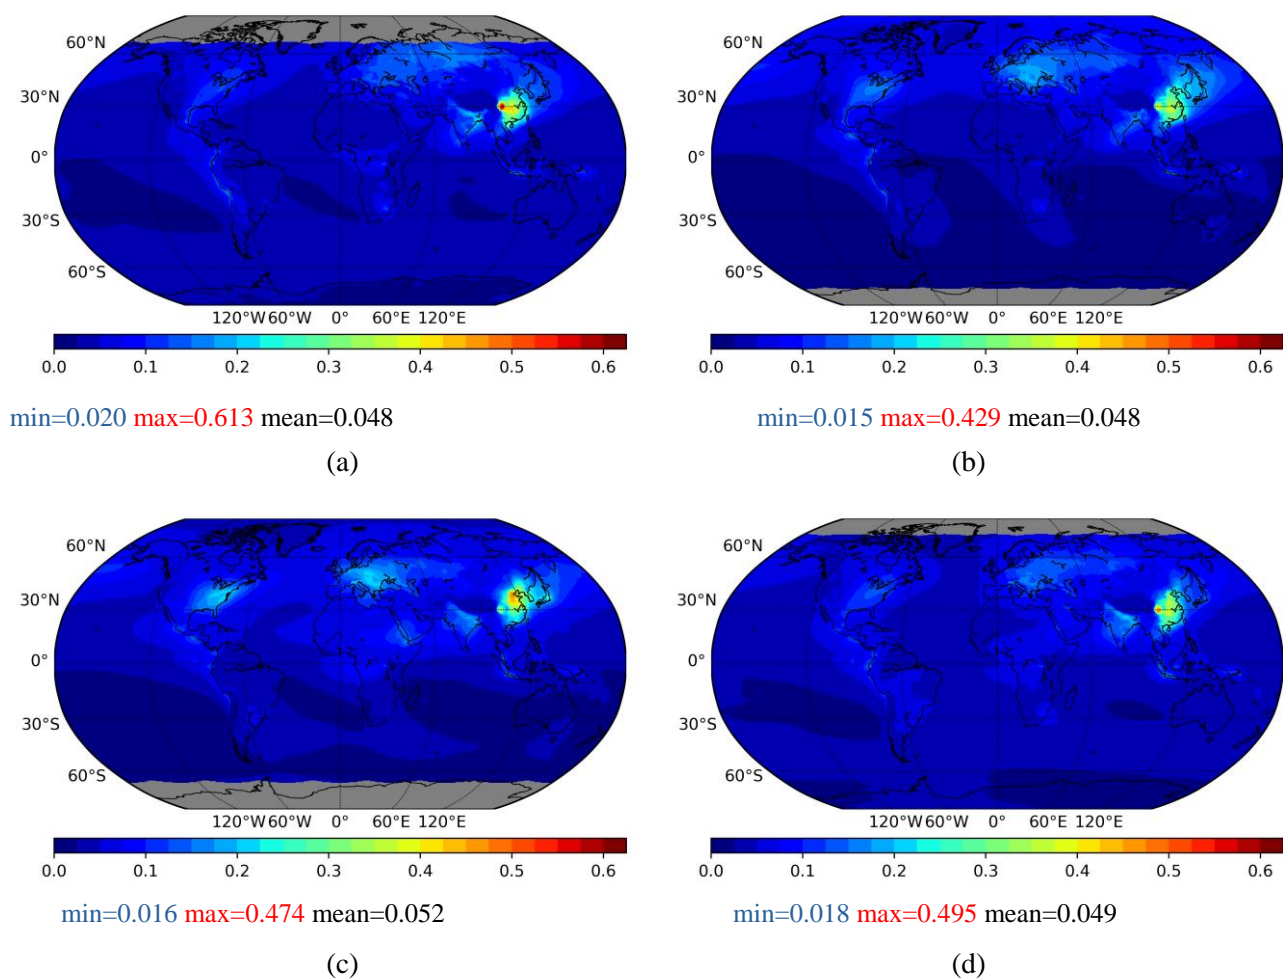

**Figure S1ii.** Mean seasonal (1980–2019) global distribution of MERRA-2 Optical Depth at the wavelength of 550 nm for sulfate particles. (a) winter, (b) spring, (c) summer, (d) autumn.

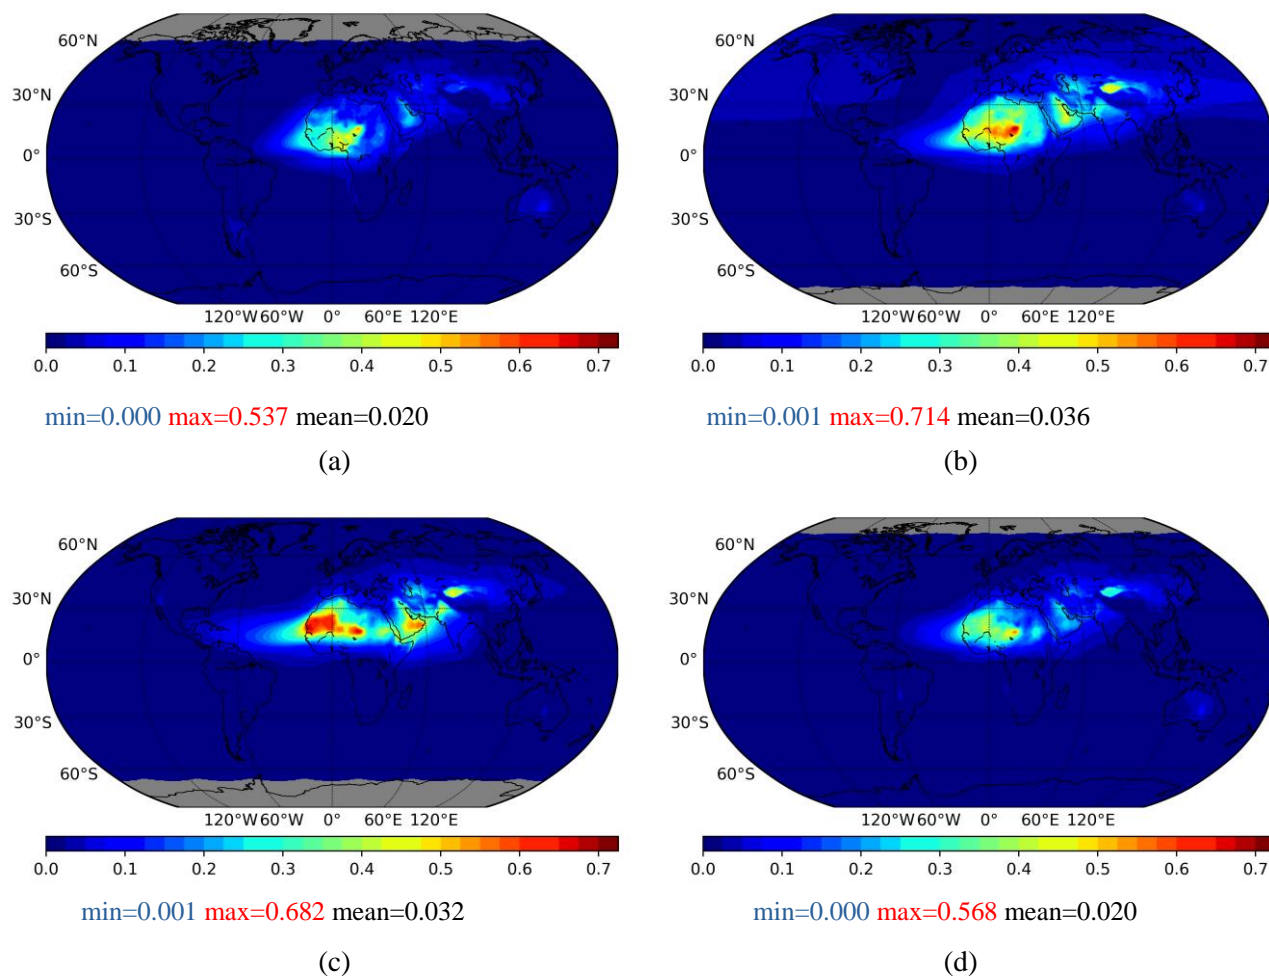

**Figure S1iii.** Mean seasonal (1980–2019) global distribution of MERRA-2 Optical Depth at the wavelength of 550 nm for dust particles. (a) winter, (b) spring, (c) summer, (d) autumn.

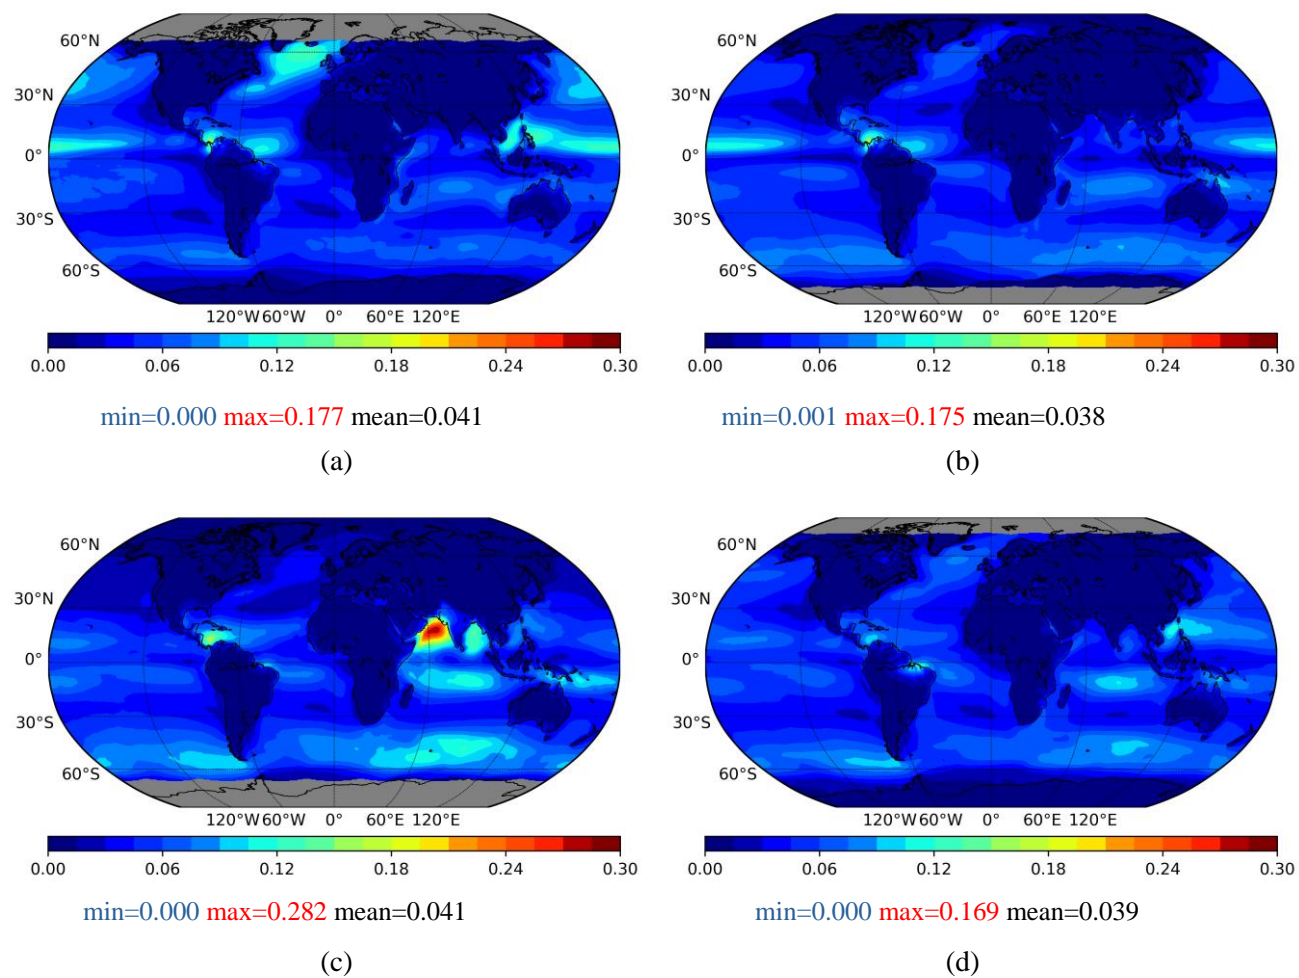

**Figure S1iv.** Mean seasonal (1980–2019) global distribution of MERRA-2 Optical Depth at the wavelength of 550 nm for dust particles. (a) winter, (b) spring, (c) summer, (d) autumn.



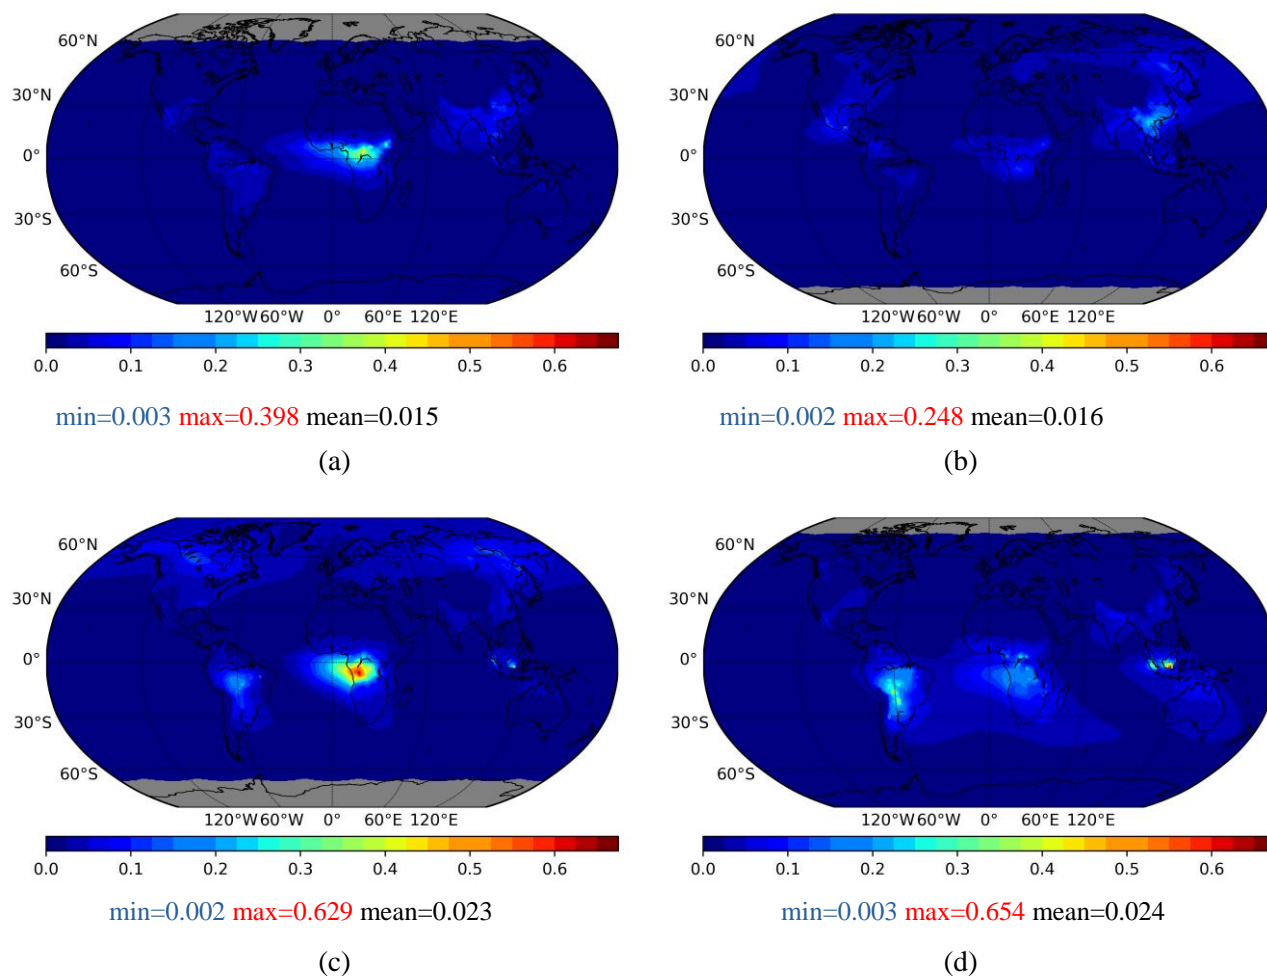

**Figure S1v.** Mean seasonal (1980–2019) global distribution of MERRA-2 Optical Depth at the wavelength of 550 nm for organic carbon particles. (a) winter, (b) spring, (c) summer, (d) autumn.

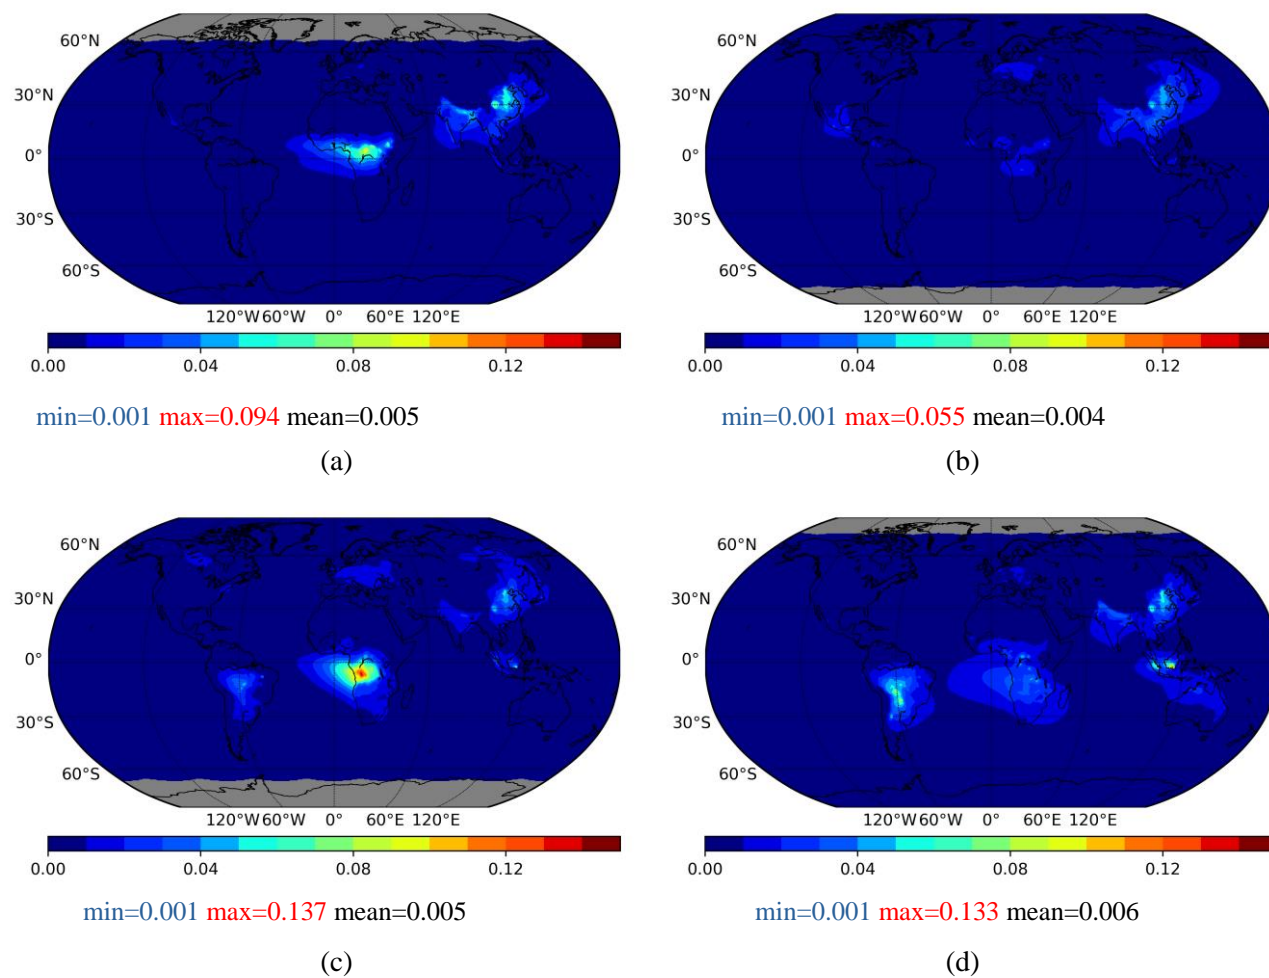

**Figure S1vi.** Mean seasonal (1980–2019) global distribution of MERRA-2 Optical Depth at the wavelength of 550 nm for black carbon particles. (a) winter, (b) spring, (c) summer, (d) autumn.

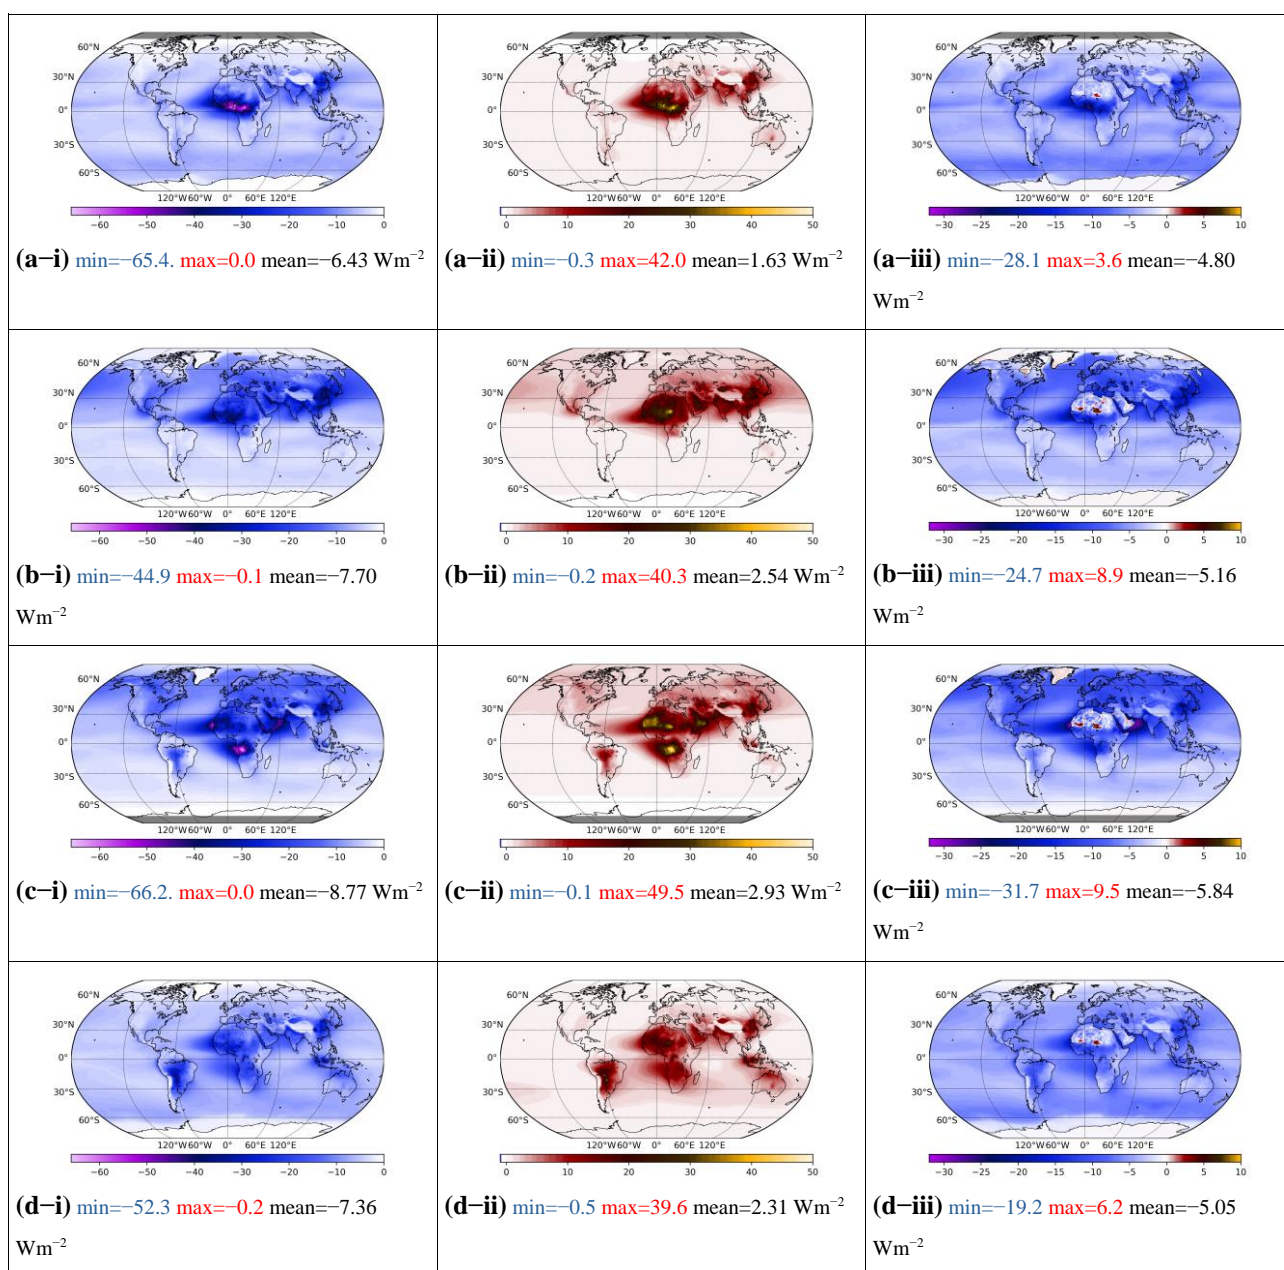

**Figure S2.** Mean (1980–2019) global distribution of total aerosol Direct Radiative Effects (i) at the Earth's surface, (ii) within the Atmosphere and (iii) at the Top Of the Atmosphere, during (a) winter, (b) spring, (c) summer and (d) autumn.



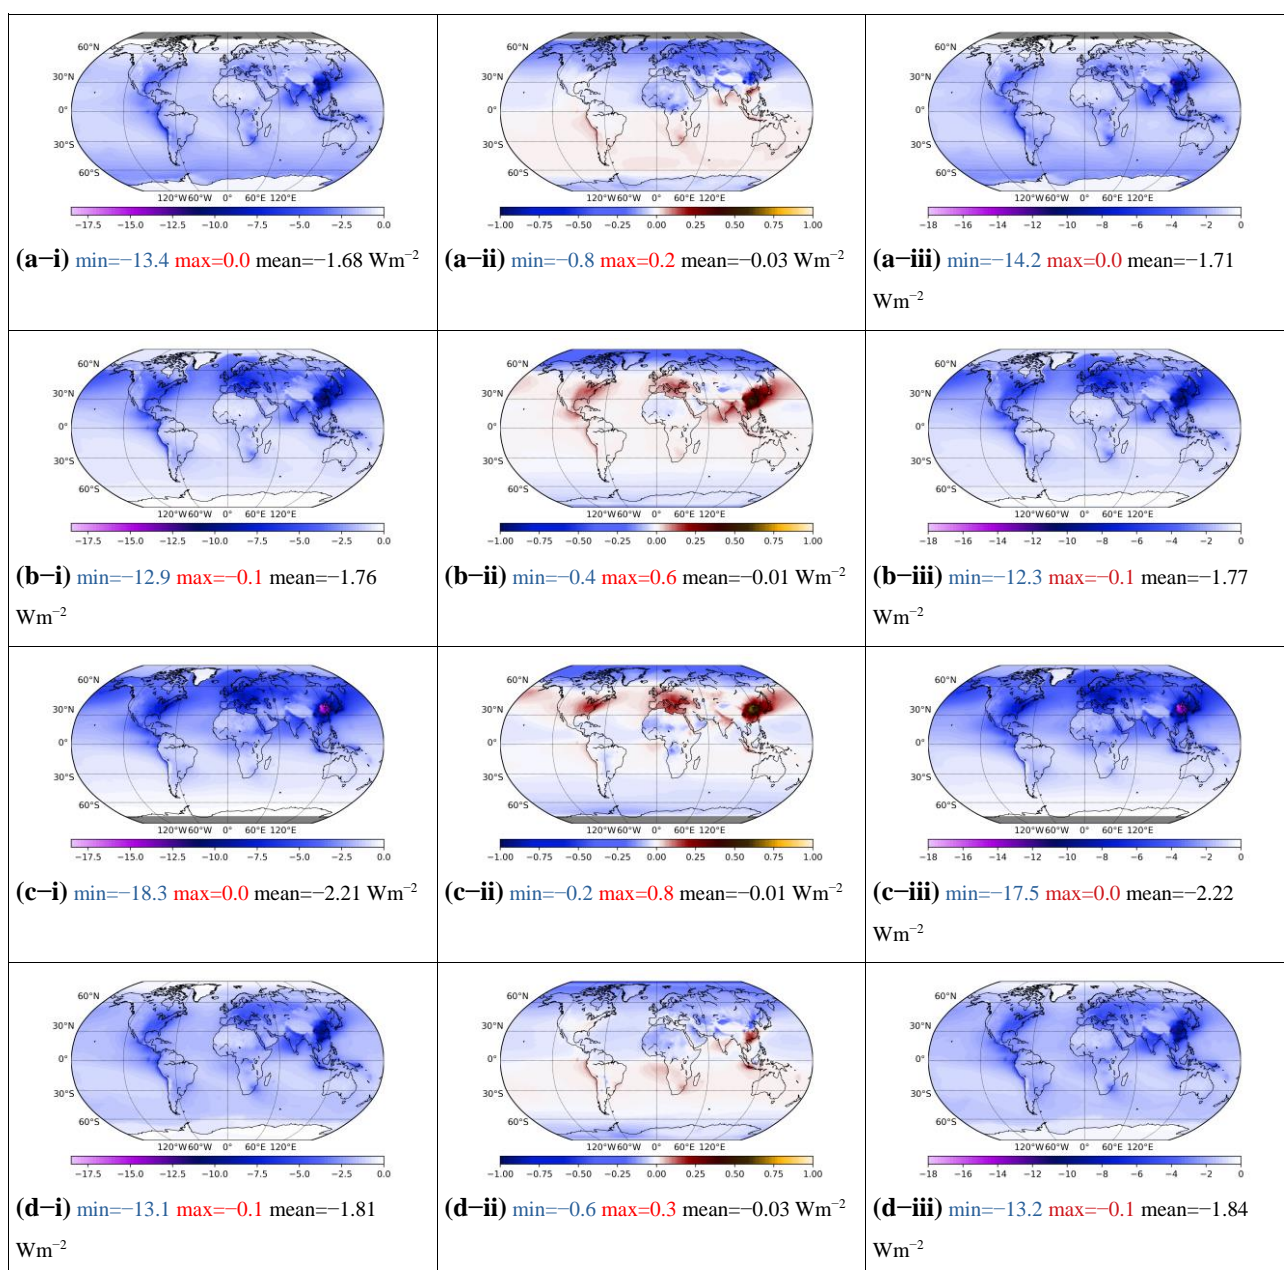

**Figure S3.** Mean (1980–2019) global distribution of sulfate aerosol Direct Radiative Effects (i) at the Earth's surface, (ii) within the Atmosphere and (iii) at the Top Of the Atmosphere, during (a) winter, (b) spring, (c) summer and (d) autumn.

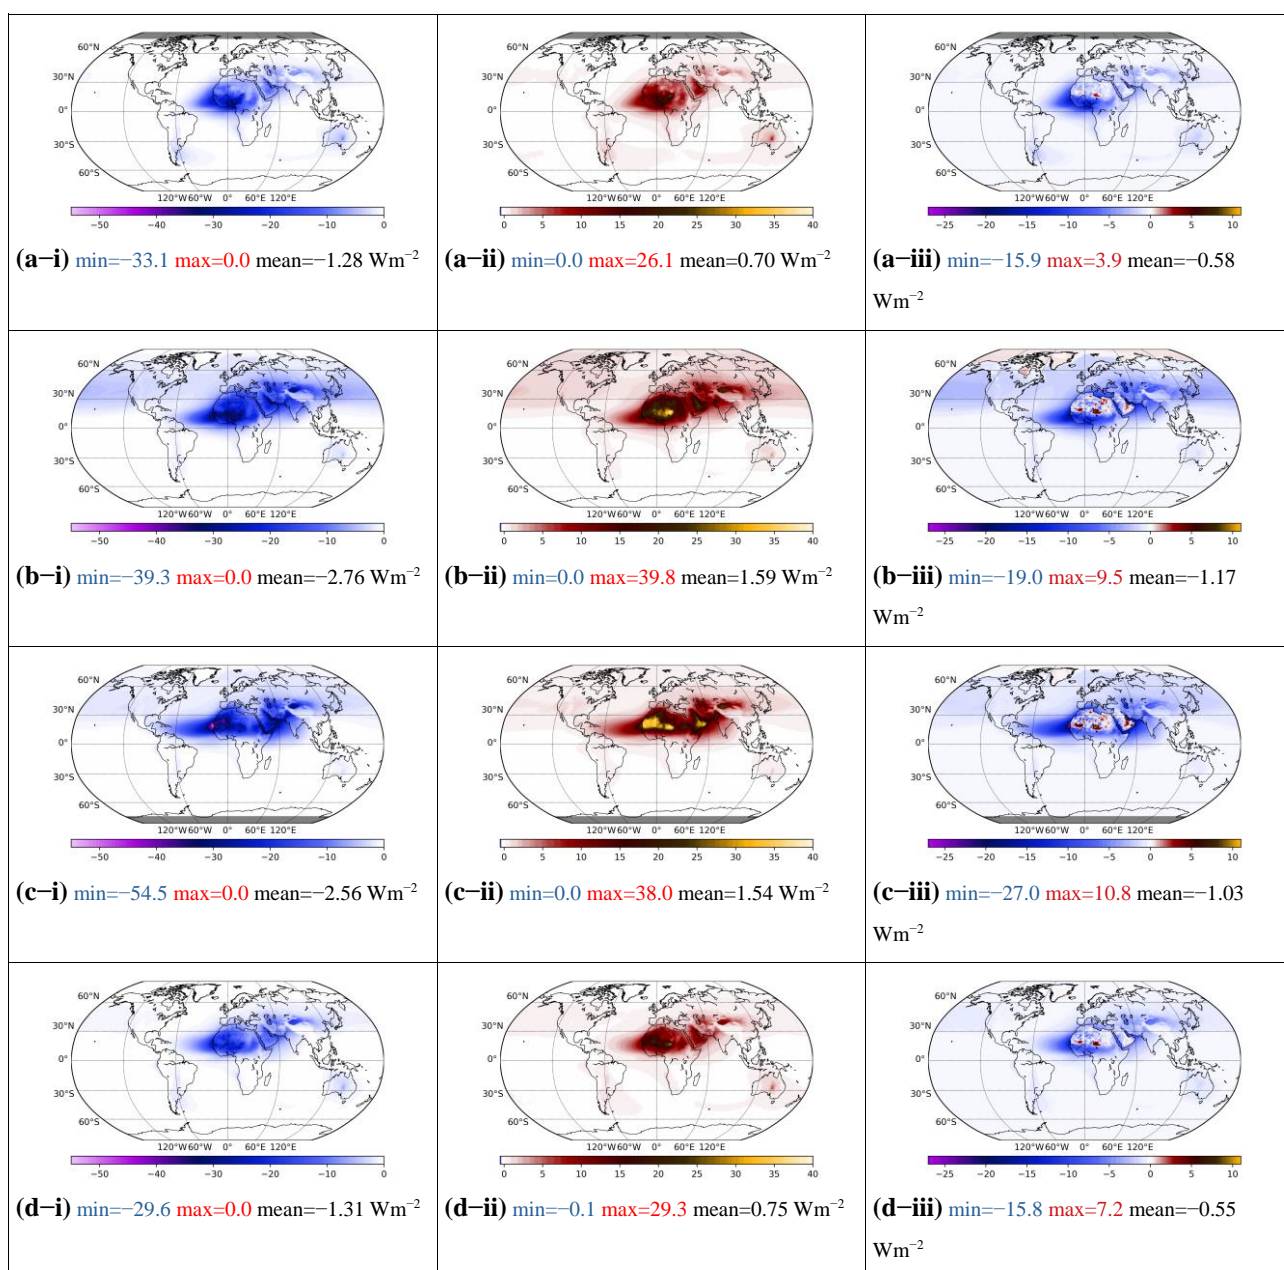

**Figure S4.** Mean (1980–2019) global distribution of dust aerosol Direct Radiative Effects (i) at the Earth's surface, (ii) within the Atmosphere and (iii) at the Top Of the Atmosphere, during (a) winter, (b) spring, (c) summer and (d) autumn.

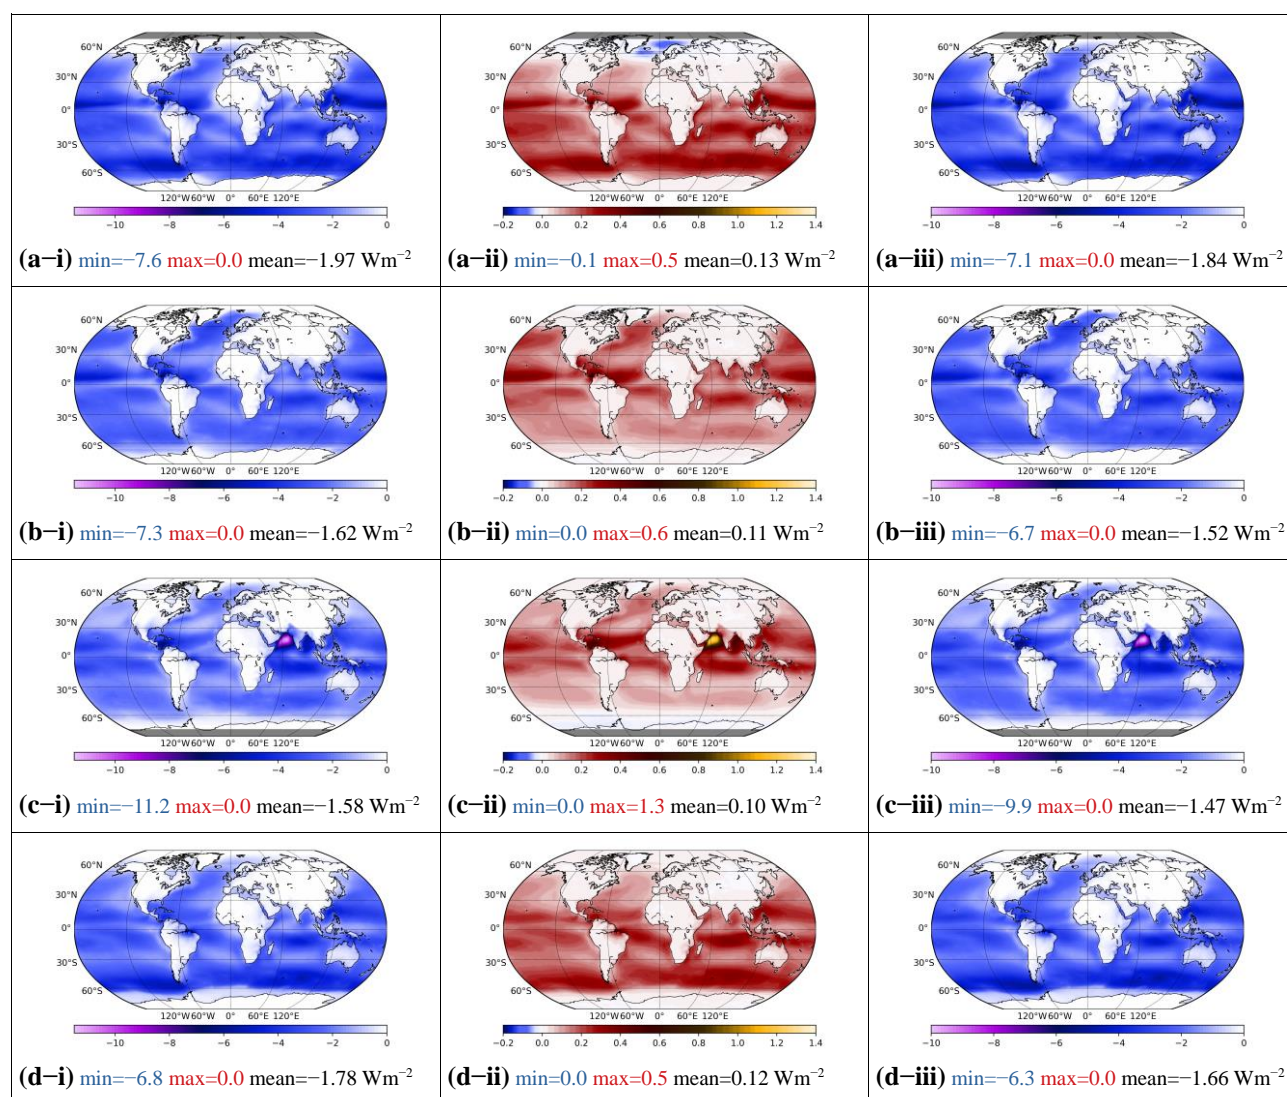

**Figure S5.** Mean (1980–2019) global distribution of sea salt aerosol Direct Radiative Effects (i) at the Earth's surface, (ii) within the Atmosphere and (iii) at the Top Of the Atmosphere, during (a) winter, (b) spring, (c) summer and (d) autumn.



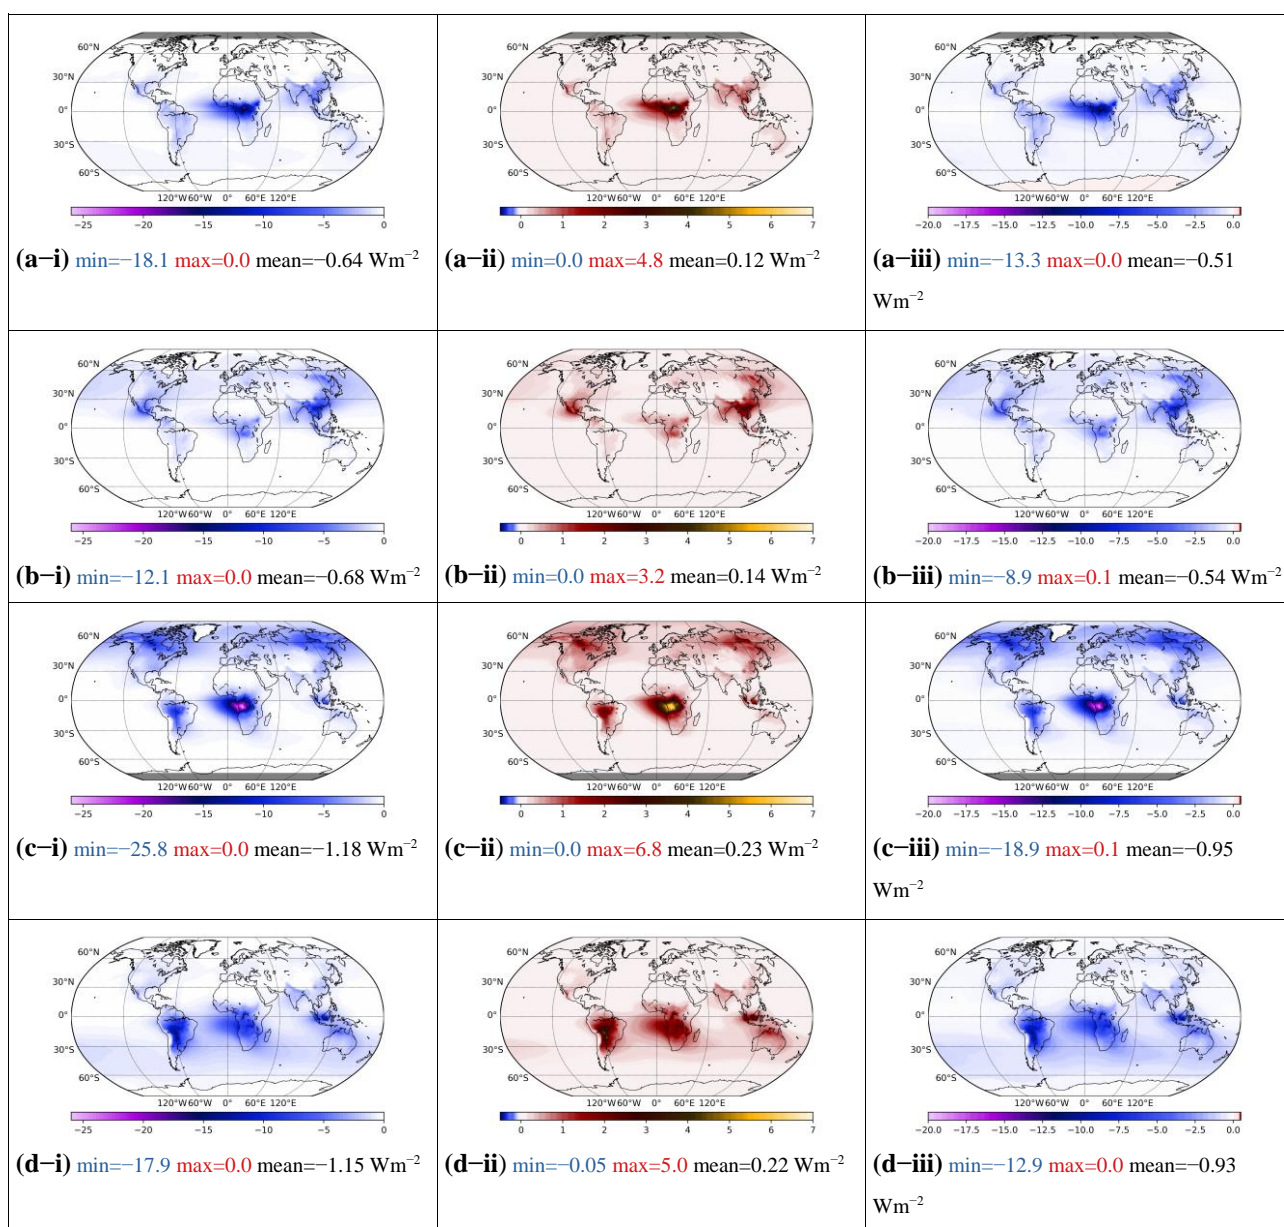

**Figure S6.** Mean (1980–2019) global distribution of organic carbon aerosol Direct Radiative Effects (i) at the Earth's surface, (ii) within the Atmosphere and (iii) at the Top Of the Atmosphere, during (a) winter, (b) spring, (c) summer and (d) autumn.

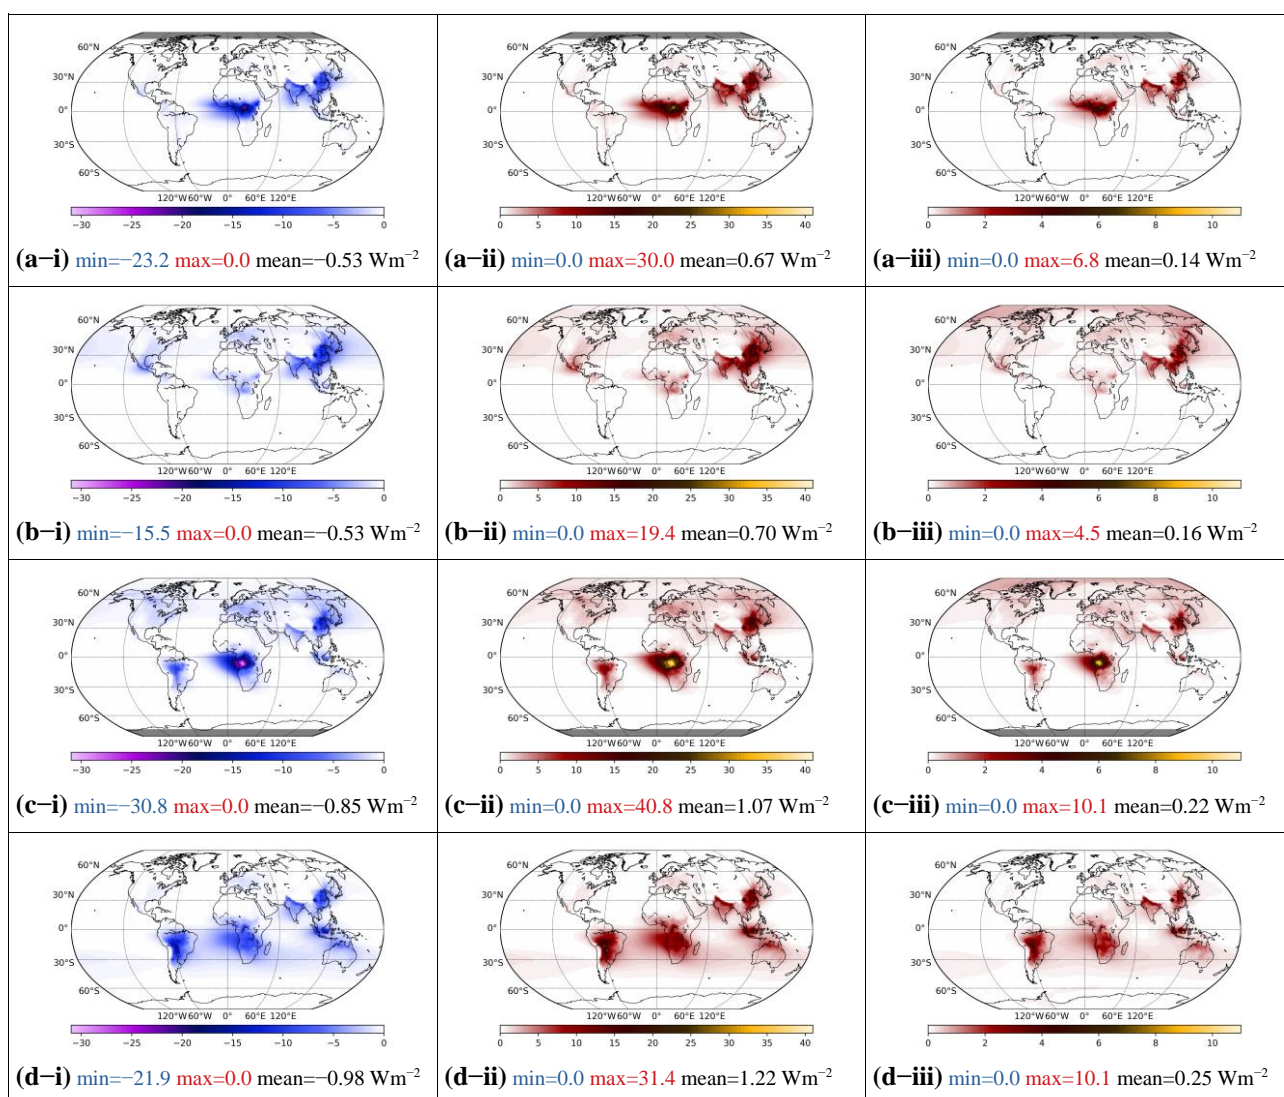

**Figure S7.** Mean (1980–2019) global distribution of black carbon aerosol Direct Radiative Effects (i) at the Earth's surface, (ii) within the Atmosphere and (iii) at the Top Of the Atmosphere, during (a) winter, (b) spring, (c) summer and (d) autumn.



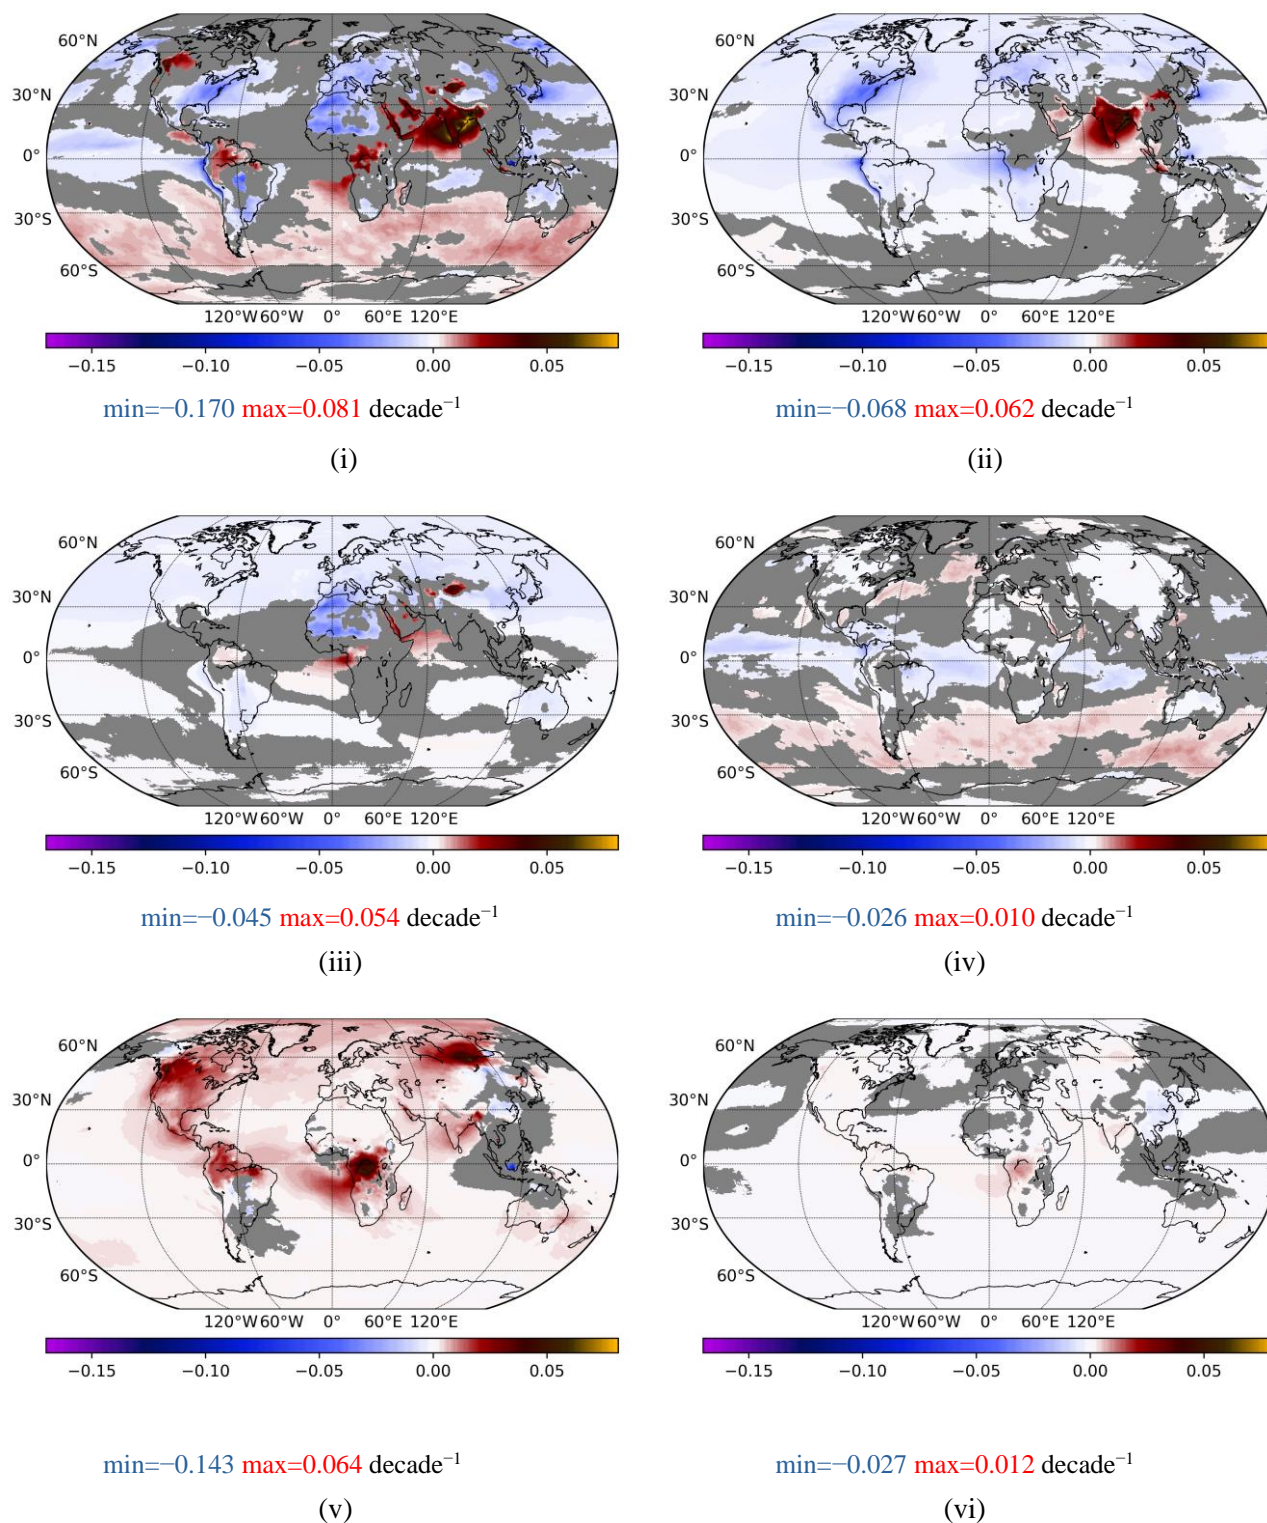

**Figure S8.** Slopes of deseasonalized MERRA-2 Optical Depth anomalies at the wavelength of 550 nm, over the period 2001–2019, for: (i) total aerosol load, (ii) sulfate, (iii) dust, (iv) sea salt, (v) organic carbon and (vi) black carbon particles. Only  $0.5^\circ \times 0.625^\circ$  cells where trends are statistically significant at a 95% confidence level are shown. (units are decade<sup>-1</sup>)

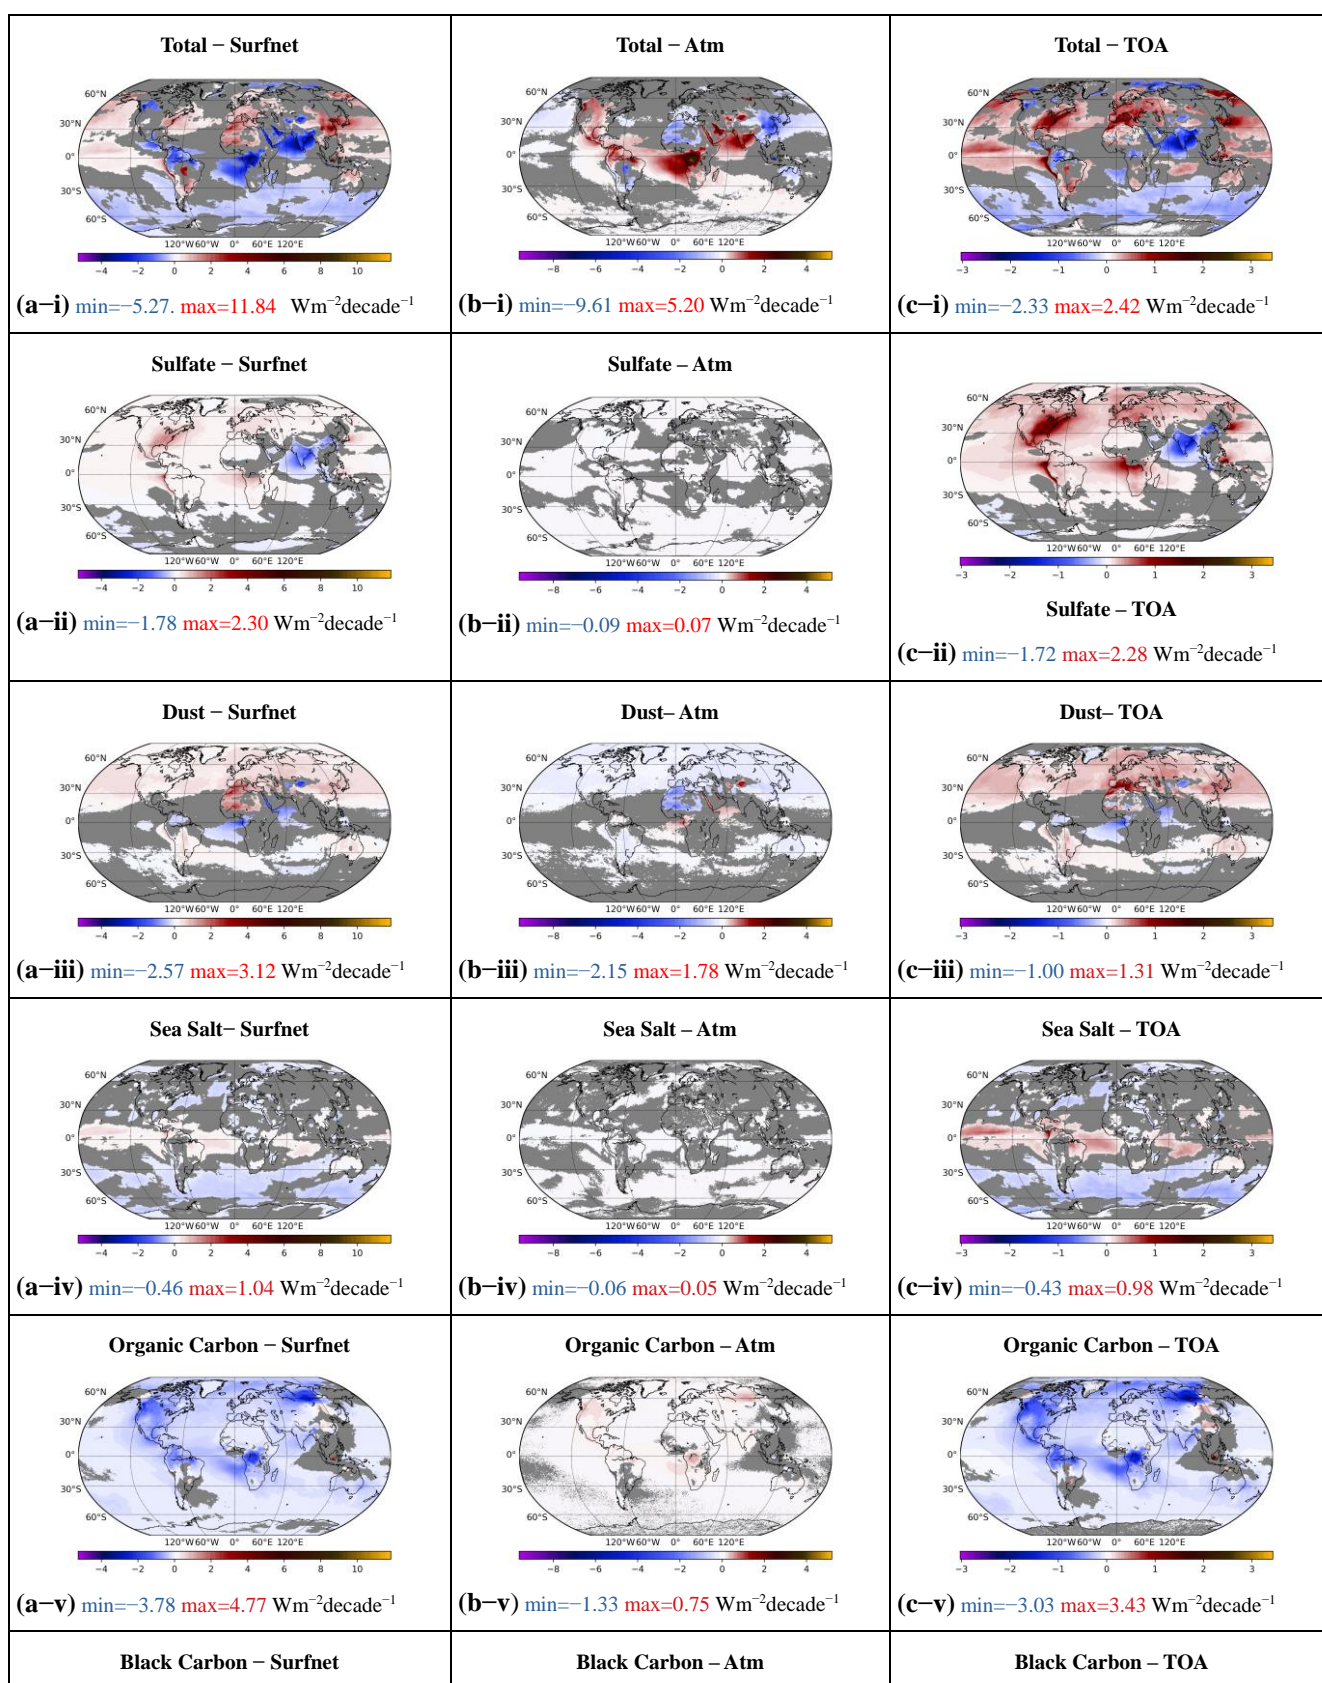

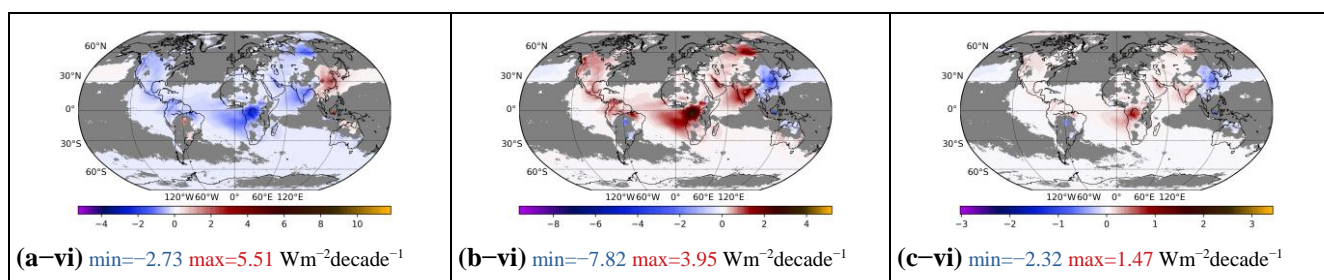

**Figure S9.** Slopes of deseasonalized Direct Radiative Effects anomalies over the period 2001–2019: (a) at the Earth's surface, (b) within the Atmosphere and (c) at the Top Of the Atmosphere. (i) total aerosol load, (ii) sulfate, (iii) dust, (iv) sea salt, (v) organic carbon and (vi) black carbon particles. Only  $0.5^\circ \times 0.625^\circ$  cells where trends are statistically significant at a 95% confidence level are shown. (units are  $\text{Wm}^{-2}\text{decade}^{-1}$ ).



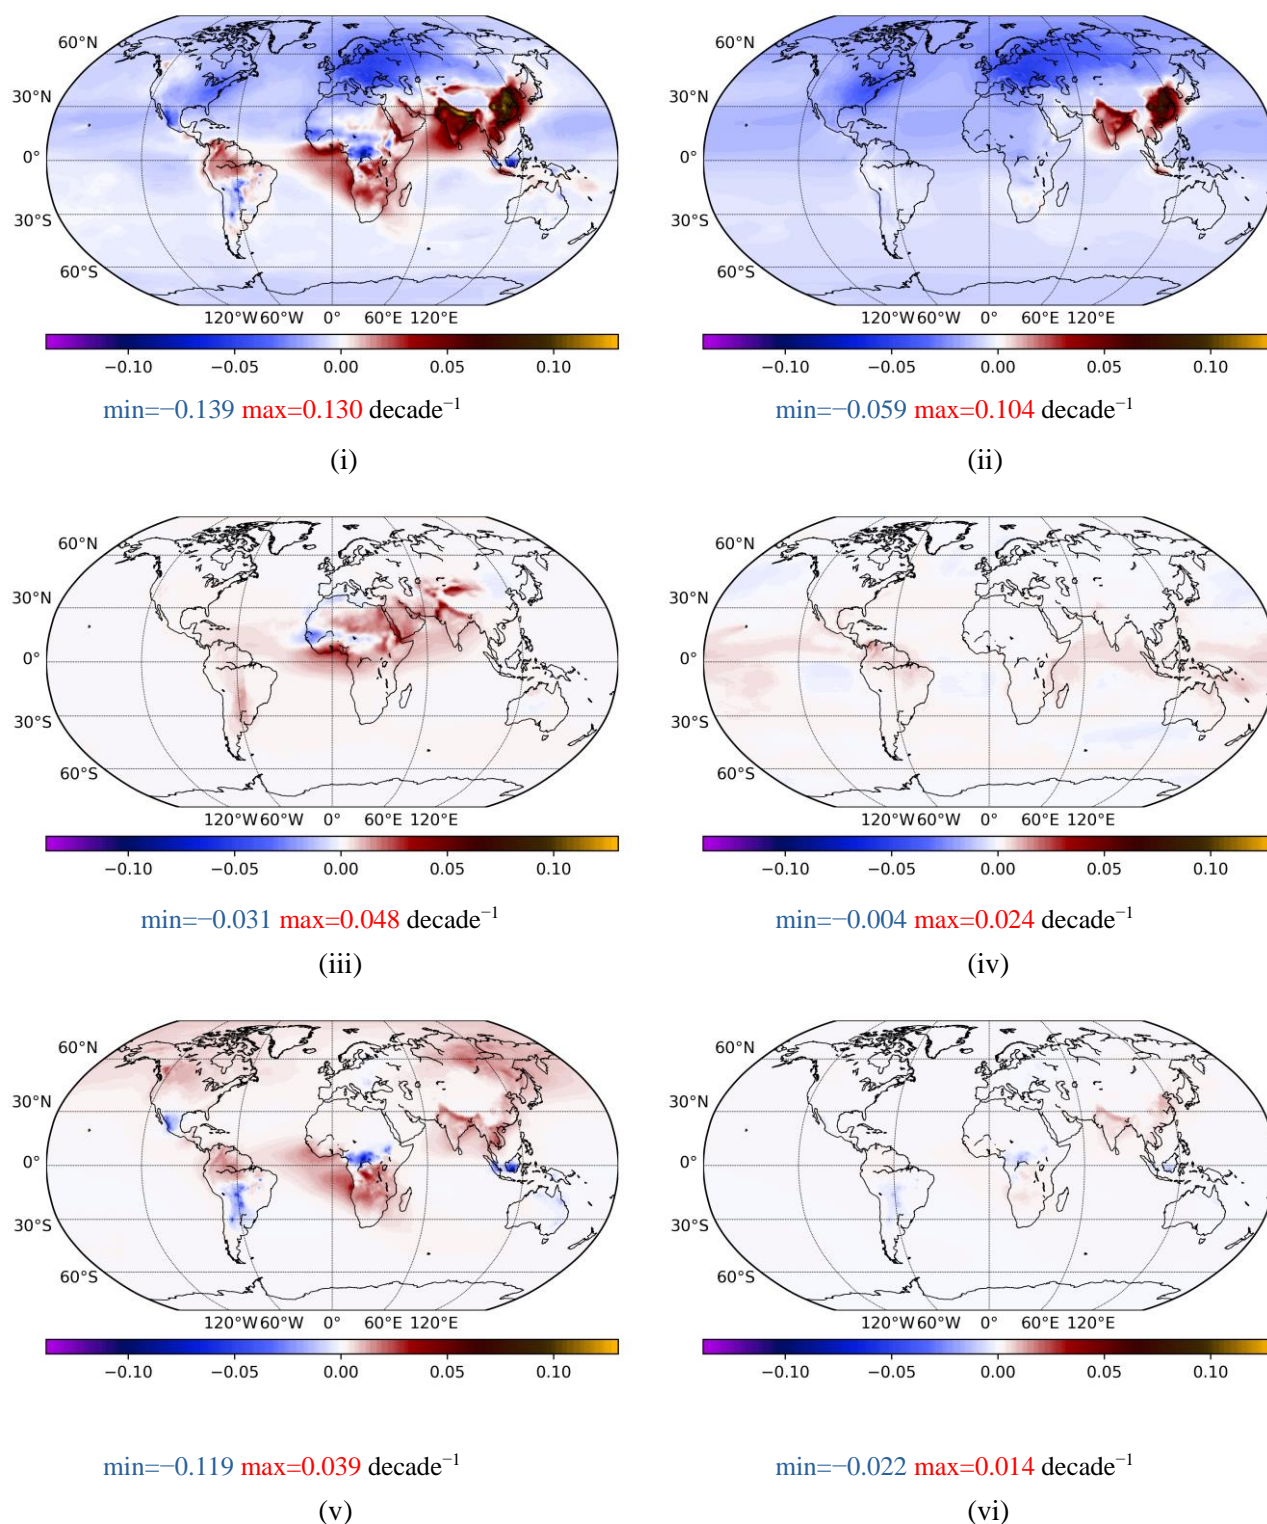

**Figure S10.** Slopes of deseasonalized MERRA-2 Optical Depth anomalies at the wavelength of 550 nm, over the period 1980–2019, for: (i) total aerosol load, (ii) sulfate, (iii) dust, (iv) sea salt, (v) organic carbon and (vi) black carbon particles. Only  $0.5^\circ \times 0.625^\circ$  cells where trends are statistically significant at a 95% confidence level are shown. (units are decade<sup>-1</sup>)

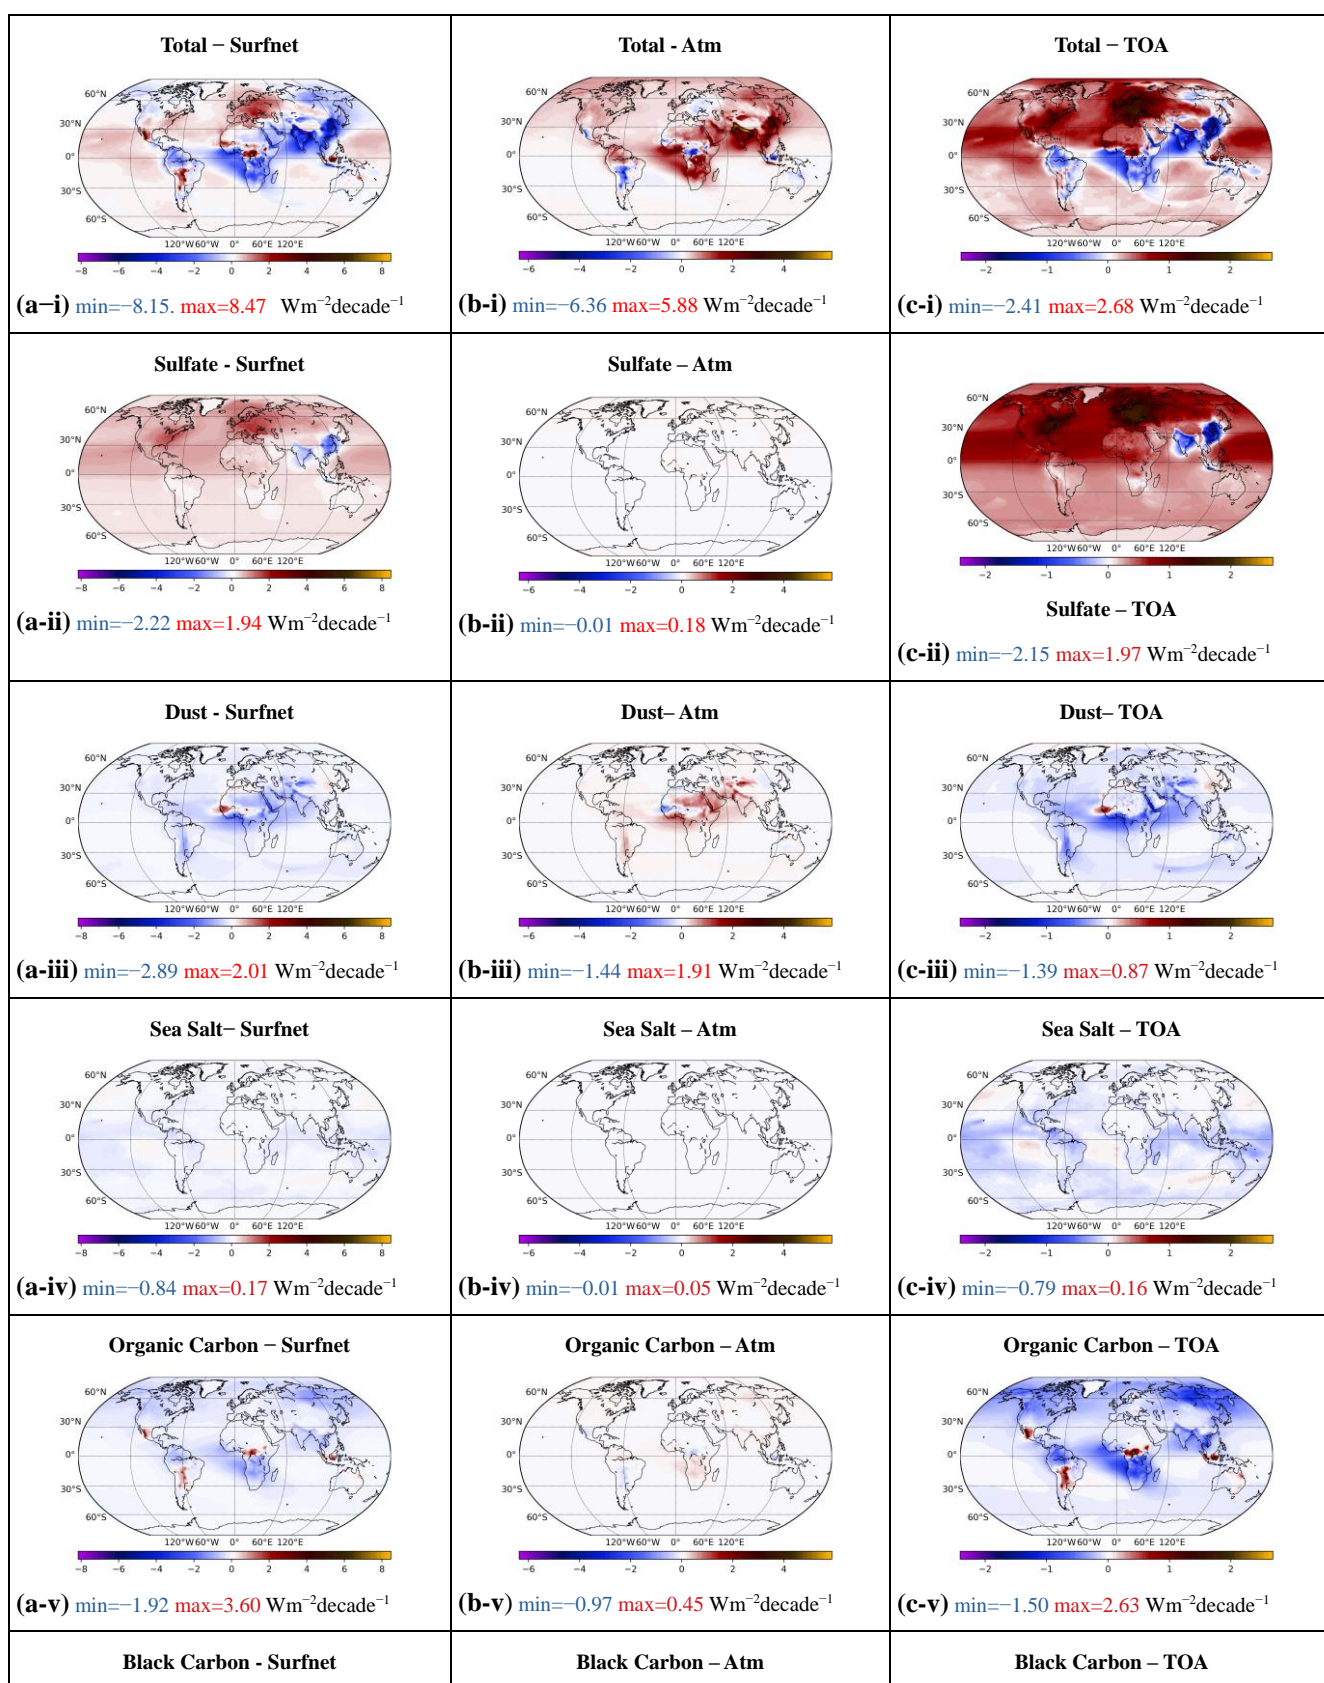



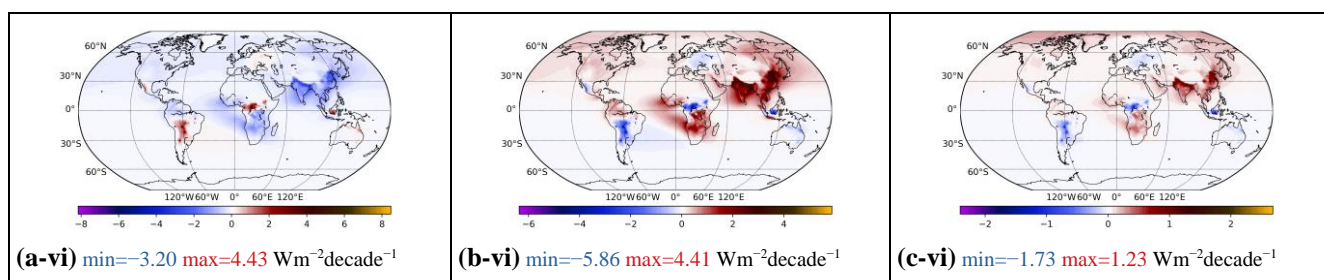

**Figure S11.** Slopes of deseasonalized Direct Radiative Effects anomalies over the period 1980-2019: **(a)** at the Earth's surface, **(b)** within the Atmosphere and **(c)** at the Top Of the Atmosphere. **(i)** total aerosol load, **(ii)** sulfate, **(iii)** dust, **(iv)** sea salt, **(v)** organic carbon and **(vi)** black carbon particles. (units are  $\text{Wm}^{-2}\text{decade}^{-1}$ )

**Table S1.** Decadal total aerosol AOD and DREs (in  $\text{Wm}^{-2}$ ) over: the globe, the North and South Hemispheres, global land and global ocean areas and 5 selected world regions (Saharan and Arabian Deserts, Southern Africa, India, East Asia and Mediterranean).

|                                |                | 1980–1989 | 1990–1999 | 2000–2009 | 2010–2019 |
|--------------------------------|----------------|-----------|-----------|-----------|-----------|
| <b>Global</b>                  | DRE surface    | −7.139    | −7.792    | −7.651    | −7.671    |
|                                | DRE atmosphere | 1.973     | 2.010     | 2.686     | 2.745     |
|                                | DRE TOA        | −5.166    | −5.781    | −4.965    | −4.926    |
|                                | AOD            | 0.137     | 0.150     | 0.136     | 0.136     |
| <b>Northern Hemisphere</b>     | DRE surface    | −9.494    | −9.819    | −10.203   | −10.084   |
|                                | DRE atmosphere | 2.891     | 2.952     | 4.104     | 4.115     |
|                                | DRE TOA        | −6.603    | −6.867    | −6.099    | −5.969    |
|                                | AOD            | 0.179     | 0.186     | 0.175     | 0.172     |
| <b>Southern Hemisphere</b>     | DRE surface    | −4.800    | −5.778    | −5.116    | −5.275    |
|                                | DRE atmosphere | 1.061     | 1.075     | 1.277     | 1.384     |
|                                | DRE TOA        | −3.739    | −4.704    | −3.839    | −3.890    |
|                                | AOD            | 0.095     | 0.116     | 0.098     | 0.100     |
| <b>Global Land</b>             | DRE surface    | −9.448    | −9.908    | −10.495   | −10.481   |
|                                | DRE atmosphere | 4.142     | 4.275     | 5.371     | 5.428     |
|                                | DRE TOA        | −5.306    | −5.633    | −5.124    | −5.053    |
|                                | AOD            | 0.174     | 0.184     | 0.175     | 0.174     |
| <b>Global Ocean</b>            | DRE surface    | −6.101    | −6.840    | −6.372    | −6.408    |
|                                | DRE atmosphere | 0.998     | 0.992     | 1.479     | 1.539     |
|                                | DRE TOA        | −5.103    | −5.848    | −4.893    | −4.869    |
|                                | AOD            | 0.120     | 0.135     | 0.119     | 0.119     |
| <b>Saharan-Arabian Deserts</b> | DRE surface    | −17.531   | −18.022   | −18.876   | −18.749   |
|                                | DRE atmosphere | 12.439    | 12.585    | 14.295    | 14.184    |
|                                | DRE TOA        | −5.092    | −5.437    | −4.581    | −4.565    |
|                                | AOD            | 0.325     | 0.341     | 0.338     | 0.335     |
| <b>Southern Africa</b>         | DRE surface    | −8.653    | −11.052   | −12.641   | −13.556   |
|                                | DRE atmosphere | 4.457     | 5.724     | 6.973     | 7.835     |
|                                | DRE TOA        | −4.195    | −5.328    | −5.668    | −5.721    |
|                                | AOD            | 0.131     | 0.164     | 0.178     | 0.184     |
| <b>India</b>                   | DRE surface    | −13.025   | −14.221   | −20.898   | −22.827   |
|                                | DRE atmosphere | 5.346     | 5.768     | 10.916    | 11.690    |
|                                | DRE TOA        | −7.679    | −8.453    | −9.981    | −11.138   |
|                                | AOD            | 0.206     | 0.230     | 0.316     | 0.357     |
| <b>East Asia</b>               | DRE surface    | −15.778   | −17.695   | −23.524   | −22.248   |
|                                | DRE atmosphere | 6.235     | 7.026     | 11.544    | 10.111    |
|                                | DRE TOA        | −9.544    | −10.669   | −11.980   | −12.137   |
|                                | AOD            | 0.264     | 0.303     | 0.388     | 0.389     |

|                      |                |         |         |         |         |
|----------------------|----------------|---------|---------|---------|---------|
| <b>Mediterranean</b> | DRE surface    | −13.012 | −11.916 | −11.792 | −10.805 |
|                      | DRE atmosphere | 4.411   | 3.915   | 5.031   | 4.655   |
|                      | DRE TOA        | −8.601  | −8.002  | −6.761  | −6.151  |
|                      | AOD            | 0.232   | 0.215   | 0.189   | 0.174   |
